# Supplementary material for: A Variant Carbapenem Inactivation Method (CIM) for Acinetobacter baumannii Group with Shortened Time-to-Result: rCIM-A
Source: MDPI journal article supplement (doi:10.3390/pathogens11040482), 2022-04-18
Supplement: s1 [file s1]

**Table S1.** Variations of incubation conditions of a 10 µg ertapenem disk in a 0.5 McFarland standard suspension of acquired carbapenemase-positive isolates ACB10R, ACB11R and the study control strains; tested conditions are marked by an "X".

| <b>Incubation-<br/>period<br/>(minutes)</b> | <b>Water</b> | <b>0.1% Triton™<br/>X-100 in water</b> | <b>0.1% Triton™<br/>X-100 in TSB</b> | <b>TSB</b> |
|---------------------------------------------|--------------|----------------------------------------|--------------------------------------|------------|
| 30                                          |              | X                                      |                                      |            |
| 60                                          |              | X                                      |                                      |            |
| 120                                         | X            | X                                      | X                                    | X          |

Trypticase soy-broth, TSB.

**Table S2.** Sensitivity of various incubation conditions of a 10 µg ertapenem disk in a 0.5 McFarland standard suspension of acquired carbapenemase-positive isolates and a positive control strain (n=3).

| <b>Incubation-<br/>period<br/>(minutes)</b> | <b>Water</b> | <b>0.1% Triton™<br/>X-100 in water</b> | <b>0.1% Triton™<br/>X-100 in TSB</b> | <b>TSB</b> |
|---------------------------------------------|--------------|----------------------------------------|--------------------------------------|------------|
| 30                                          |              | 1/3 <sup>1</sup>                       |                                      |            |
| 60                                          |              | 1/3 <sup>1</sup>                       |                                      |            |
| 120                                         | 0            | 3/3                                    | 3/3                                  | 0          |

<sup>1</sup> ACB10R not detected; trypticase soy-broth, TSB.
