# Supplementary material for: A Variant Carbapenem Inactivation Method (CIM) for Acinetobacter baumannii Group with Shortened Time-to-Result: rCIM-A
Source: MDPI journal article supplement (doi:10.3390/pathogens11040482), 2022-04-18
Supplement: s1 [file s1]

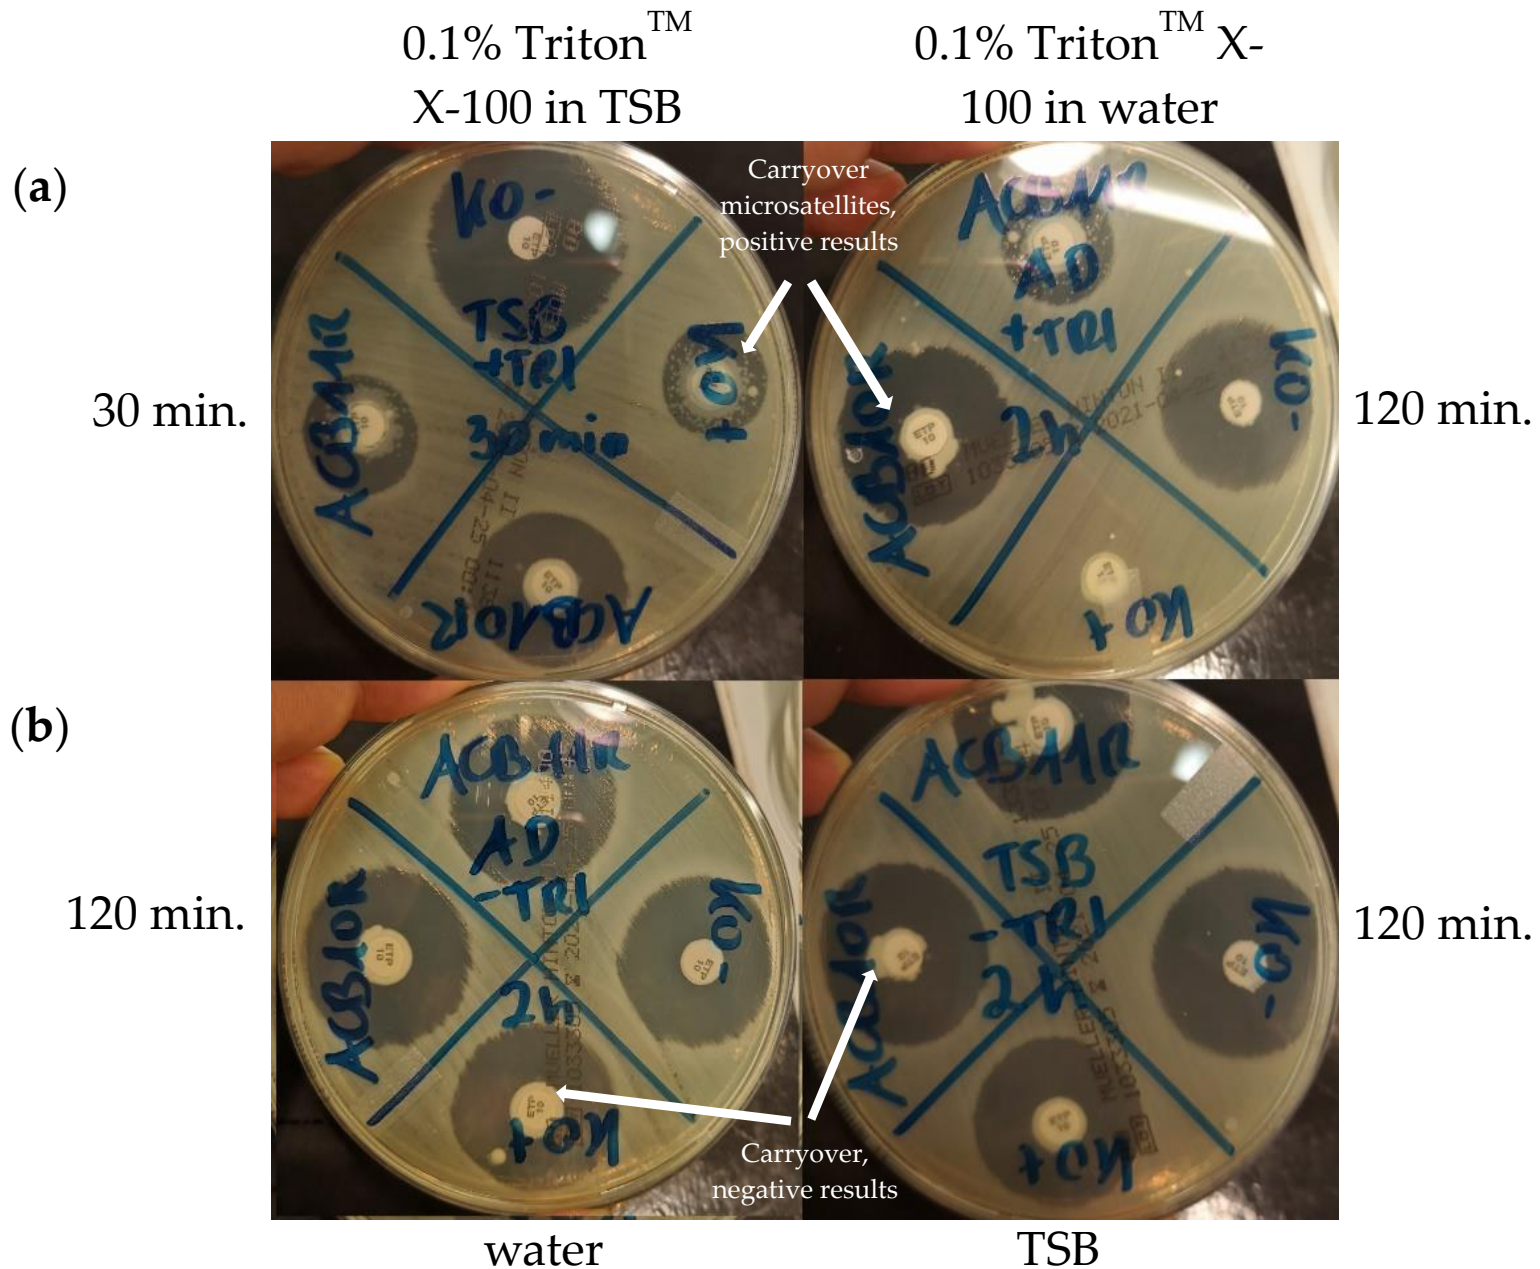

**Figure S1.** Results of various incubation conditions of a 10 µg ertapenem disk in a 0.5 McFarland standard suspension of acquired carbapenemase-positive isolates (ACB10R, ACB11R) and the positive and negative study control strains; **a.** suspensions without addition of 0.1% (vol/vol) Triton<sup>TM</sup> X-100 did not result in detection of carbapenemases; **b.** suspensions with addition of 0.1% (vol/vol) Triton<sup>TM</sup> X-100 enabled for detection of carbapenemase-positive strains; trypticase soy-broth, TSB; 0.1% (vol/vol) Triton<sup>TM</sup> X-100, TRI; water, AD; ertapenem 10 µg potency disk, ETP.
